# Supplementary material for: Atomic Layer Deposition of Mixed-Layered Aurivillius Phase on TiO2 Nanotubes: Synthesis, Characterization and Photoelectrocatalytic Properties
Source: PubMed Central journal article supplement (PMC7693954; doi:10.3390/nano10112183), 2020-11-02
Supplement: nanomaterials-10-02183-s001.pdf [file nanomaterials-10-02183-s001.pdf]

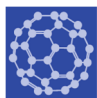

# Atomic Layer Deposition of Mixed-Layered Aurivillius Phase on TiO<sub>2</sub> Nanotubes: Synthesis, Characterization and Photoelectrocatalytic Properties

Farid Orudzhev <sup>1\*</sup>, Shikhgasan Ramazanov <sup>1</sup>, Dinara Sobola <sup>1,2,3</sup>, Abdulgalim Isaev <sup>1</sup>, Chuanyi Wang <sup>4</sup>, Asiyat Magomedova<sup>1</sup>, Makhmud Kadiev<sup>1</sup>, Kasinatan Kaviyarasu<sup>5,6</sup>

<sup>1</sup> Dagestan State University, st. M. Gadjieva 43-a, Dagestan Republic, Makhachkala 367015, Russia

<sup>2</sup> Department of Physics, Faculty of Electrical Engineering and Communication, Brno University of Technology, Technická 2848/8, Brno 61600, Czech Republic Laboratory of Environmental Science and Technology

<sup>3</sup> Central European Institute of Technology BUT, Purkyňova 123, Brno 61200, Czech Republic

<sup>4</sup> Shaanxi University of Science & Technology, Xi'an, Shaanxi 710021, China

<sup>5</sup> UNESCO-UNISA Africa Chair in Nanoscience's/Nanotechnology Laboratories, College of Graduate Studies, University of South Africa (UNISA), Muckleneuk Ridge, P O Box 392, Pretoria, South Africa.

<sup>6</sup> Nanosciences African Network (NANOAFNET), Materials Research Group (MRG), iThemba LABS-National Research Foundation (NRF), 1 Old Faure Road, 7129, P O Box 722, Somerset West, Western Cape Province, South Africa.

\* Correspondence: ff.orudzhev@dgu.ru; Tel.: +7-928-866-26-22

## Photoelectrochemical measurement

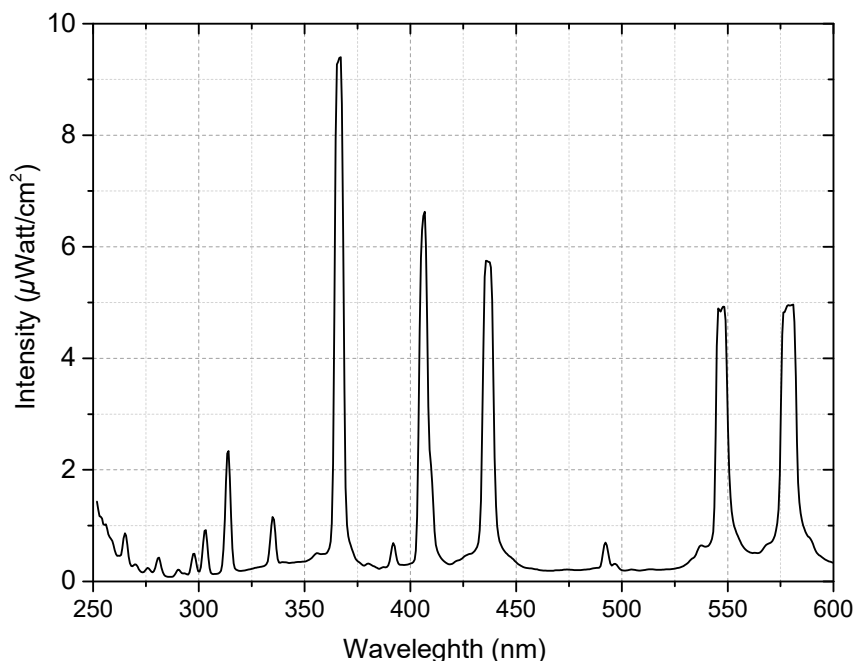

**Figure S1.** Emission spectrum of 250 W discharge mercury vapor lamp with a preliminary removed phosphor layer.
